# Supplementary figures and images for: Piperlongumine, a Piper longum-derived amide alkaloid, protects mice from ovariectomy-induced osteoporosis by inhibiting osteoclastogenesis via suppression of p38 and JNK signaling
Source: Royal Society of Chemistry journal article supplement (doi:10.1039/d3fo03830k), 2024-01-01

p65

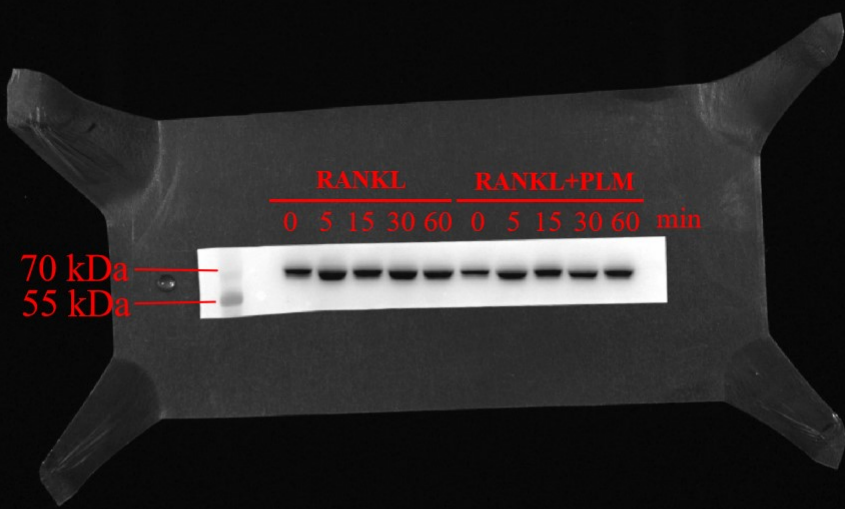

p-p65

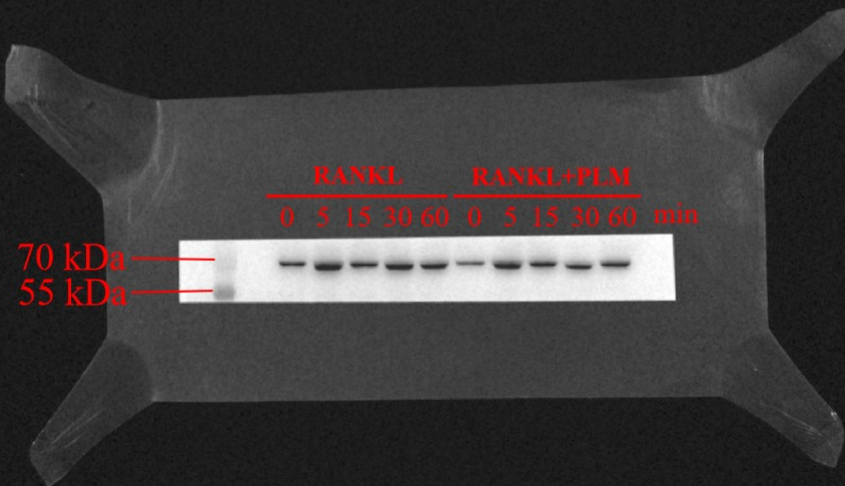









## GAPDH

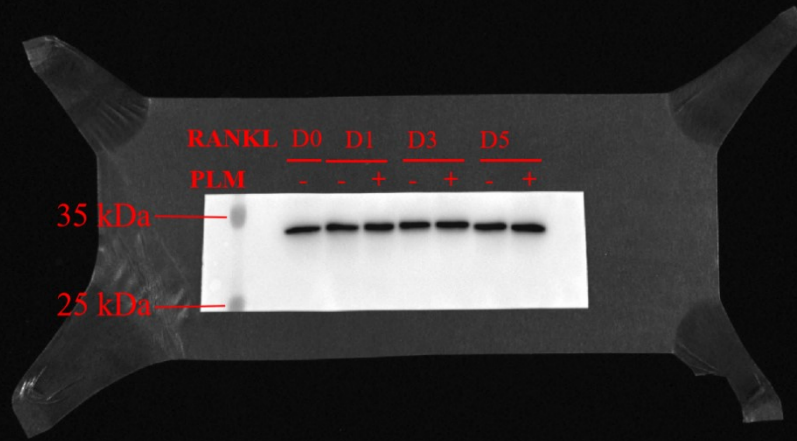

## NFATc1

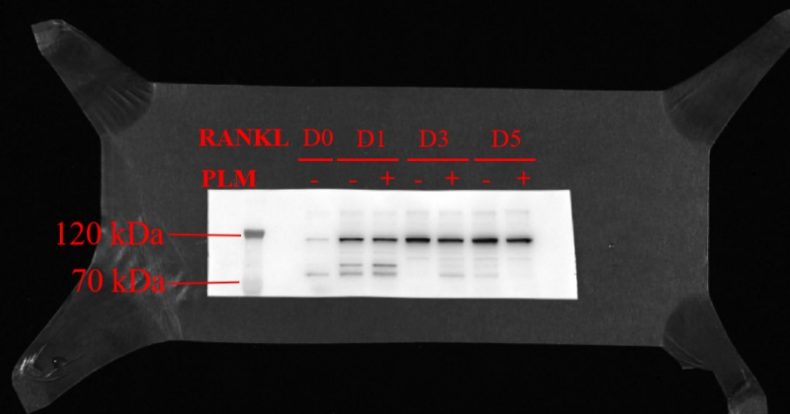

Supplement: d3fo03830k1.pdf [file d3fo03830k1.pdf]
